# Supplementary material for: Comprehensive Analysis of Tumor Immune Microenvironment and Prognosis of m6A-Related lncRNAs in Gastric Cancer
Source: Research Square preprint supplement (doi:10.21203/rs.3.rs-558845/v1), 2021-06-02
Supplement: Supplementary file 2 [file a98e801636b2fe7da69ec74a.docx]

# Supplementary Figures and Tables

**Table S1. Sequences of qPCR primers to detect RNA expression**

| Gene name | Gene ID | Chr | Coordinate | Primer sequence (5'->3') | |
| --- | --- | --- | --- | --- | --- |
| Forward primer | Reverse primer |
| AC026691.1 | lnc-SLC25A48-8 | 5 | 135,399,280-135401296 | CTCACCGGGATGCTTTACACC | ATCCAGCACCCAAATCGATG |
| AL139147.1 | lnc-INSL5-2 | 1 | 66,665,864-66,677,027 | AGCCTCTACCAATGTGATGCG | TCGTCATTCCCGACTACGTT |
| AL590705.3 | lnc-CTSV-3 | 9 | 97195338-97200041 | TGTGGTACATCAGGGAACTCAC | CTTTCCTTGGCAGAACCACAATT |
| AC022031.2 | lnc-RAB27B-11 | 18 | 55,721,063-55,759,122 | TCCCTACAAGACTGAAGCACCA | CCTCGTGTTCAGGACAAGCA |
| TYMSOS | lnc-ENOSF1-5 | 18 | 649,620-658,340 | CTCGCAGGATTGAGGTTAGGAC | GCGCTACAGCCTGAGAGGTGA |
| AL355574.1 | lnc-KCNT1-1 | 9 | 135,907,812-135,913,513 | AGCCGTCTGAAAAGAACACGA | TGTAGAATAAGCCAATGTCCACT |
| AL390961.1 | lnc-APBB1IP-1 | 10 | 26,643,228-26,645,016 | CAAGGAAGGACCAAGCGACC | AGATGTCAGAGCCTCAGGACG |
| AC005586.1 | lnc-RARRES2-2 | 7 | 150,363,777-150,372,590 | GATTCCTGAGCCTTTATGCCAG | CTTGTCAAAAGCTGAGACCGT |
| AP000873.4 | lnc-ANKRD42-1 | 11 | 83,180,144-83,184,520 | AGAGATAATGGGTTGGAGGCA | AACCATCACCCTCAACACTAG |
| GAPDH |  | 12 | 6,534,517-6,538,371 | ACAACTTTGGTATCGTGGAAGG | GCCATCACGCCACAGTTTC |


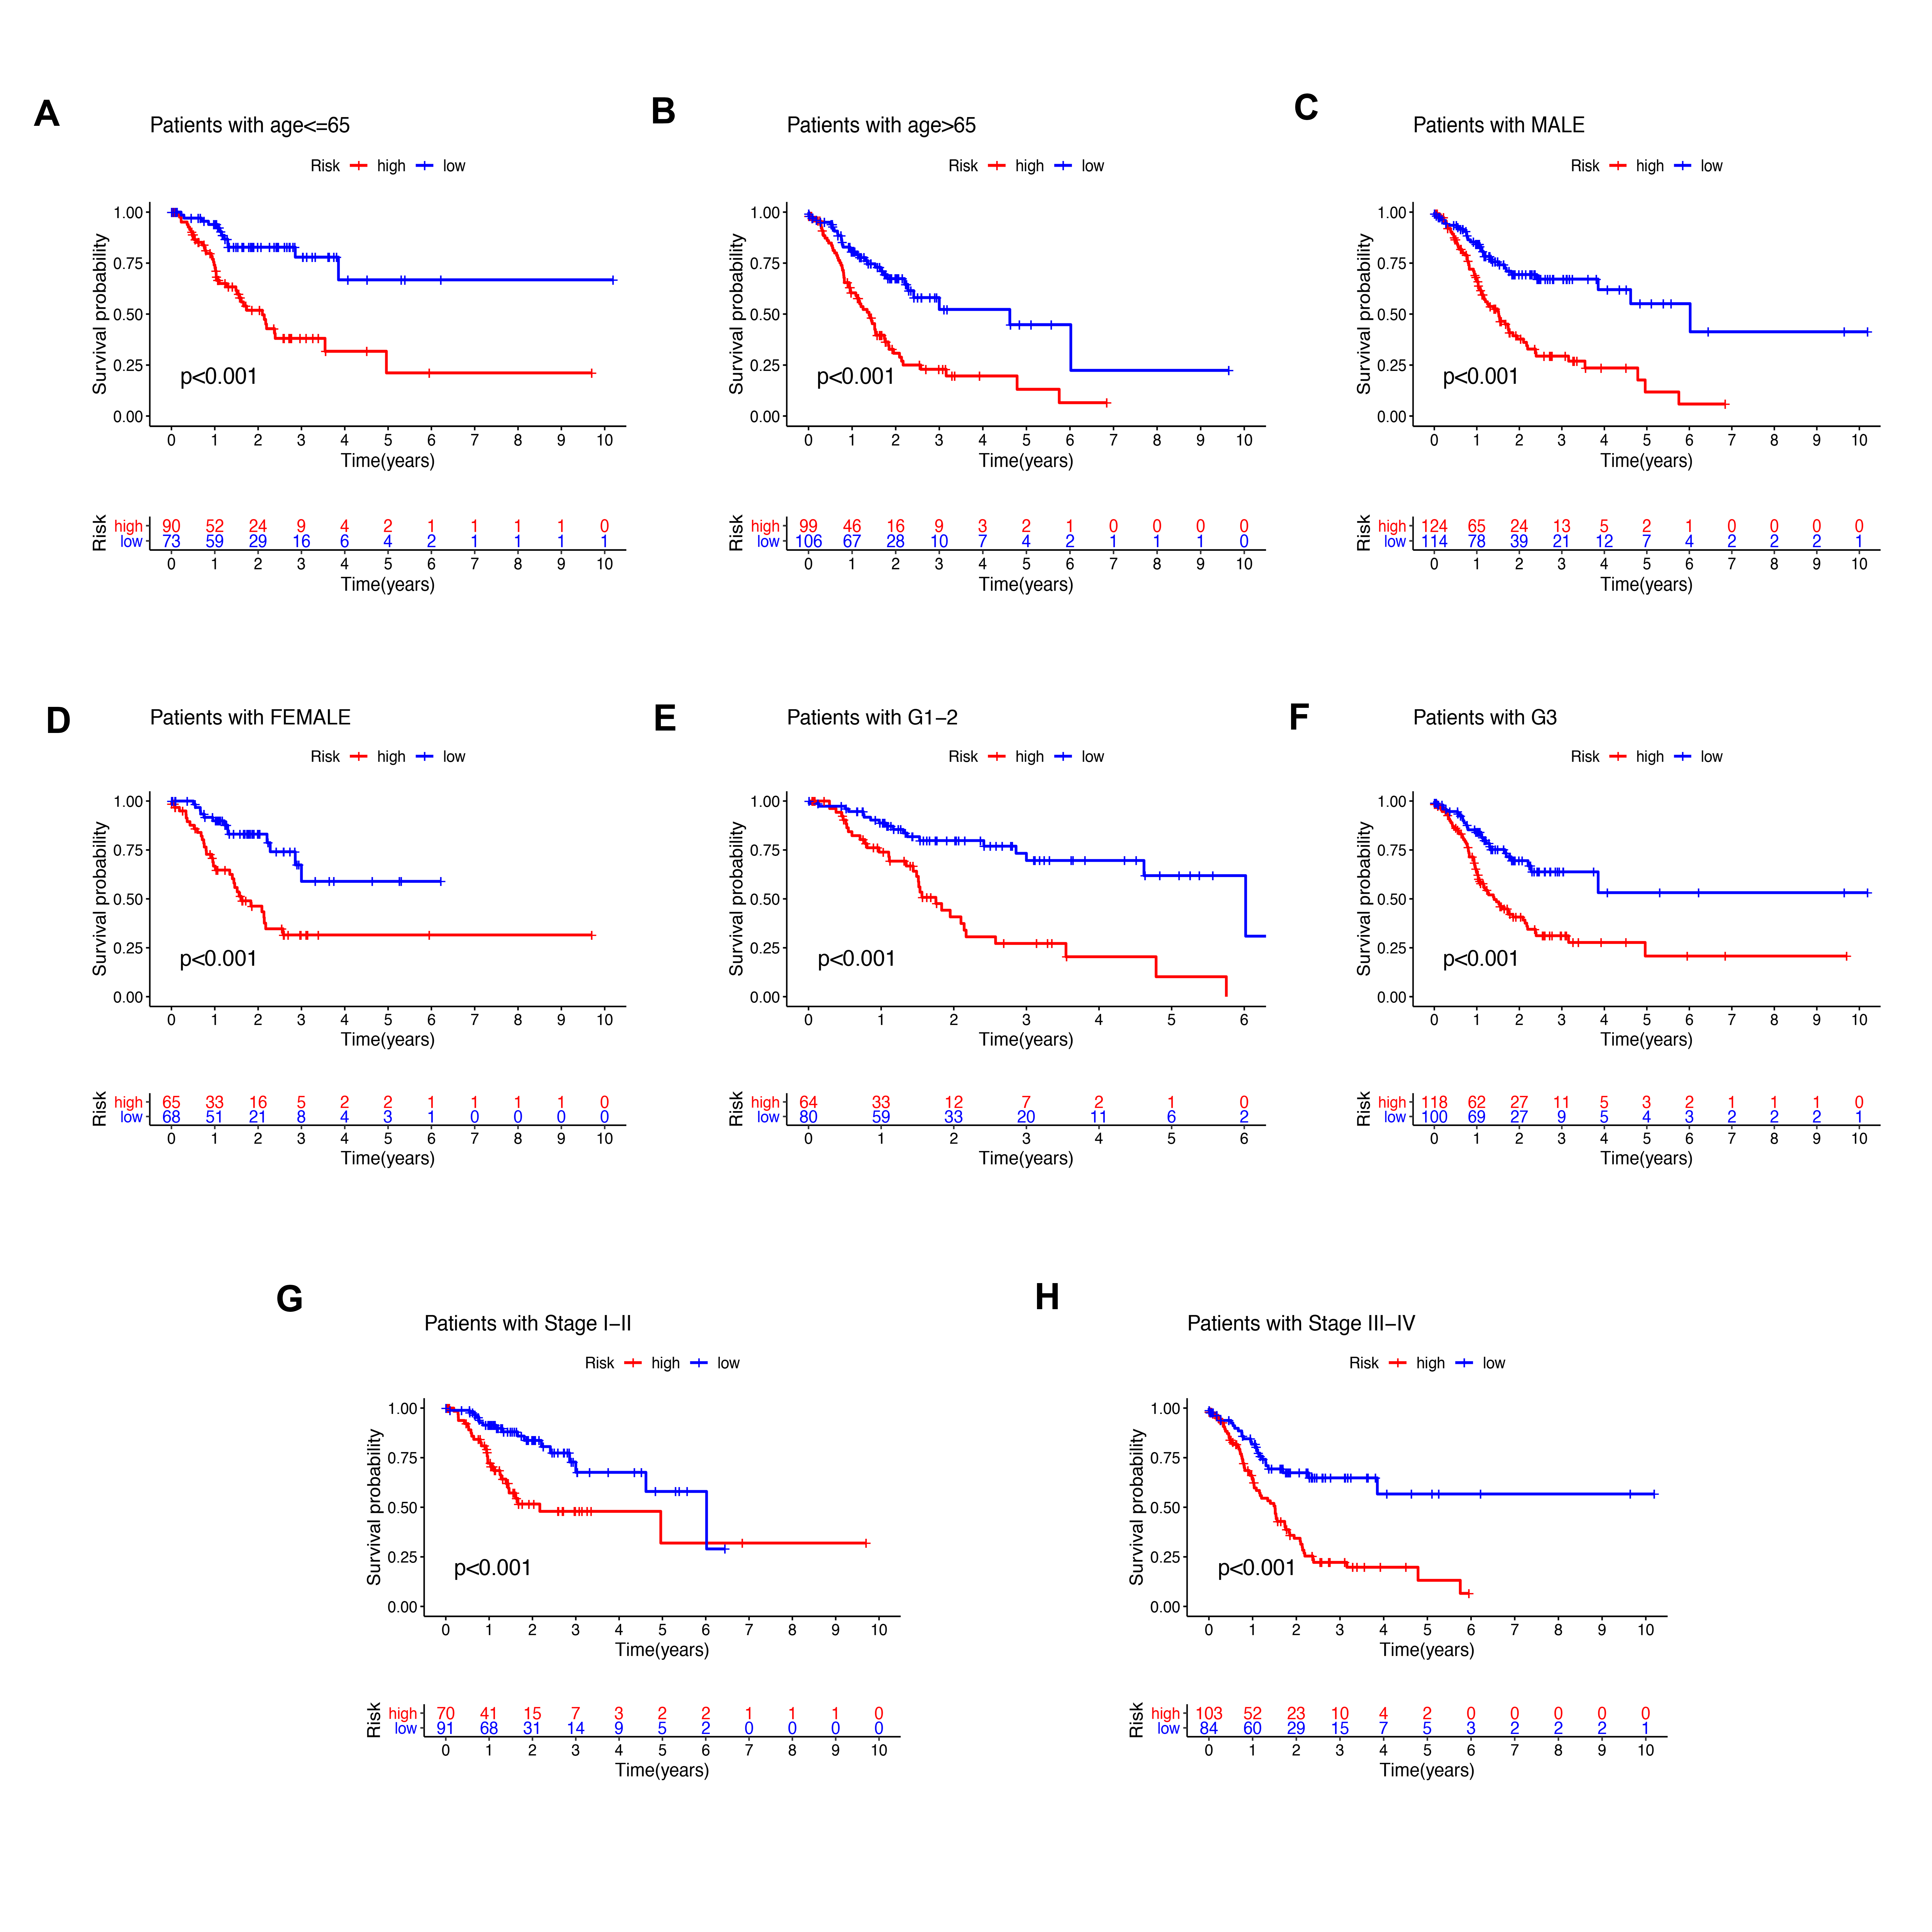


**Figure S1. Subgroup Kaplan-Meier analysis of high/low risk group.** (A-H) Survival analysis of high/low risk group in the samples of age less than or equal to 65 (A), age more than 65 (B), male (C), female (D), grade1 and 2 (E), grade3 (F), stage I-II (G) and stage III-IV (H).
